# Supplementary material
Source: PubMed Central journal article supplement (PMC4277218)
Supplement: supp_tpc.114.130807_tpc130807_SupplementalRev.pdf [file supp_tpc.114.130807_tpc130807_SupplementalRev.pdf]

**SUPPLEMENTAL FIGURES**

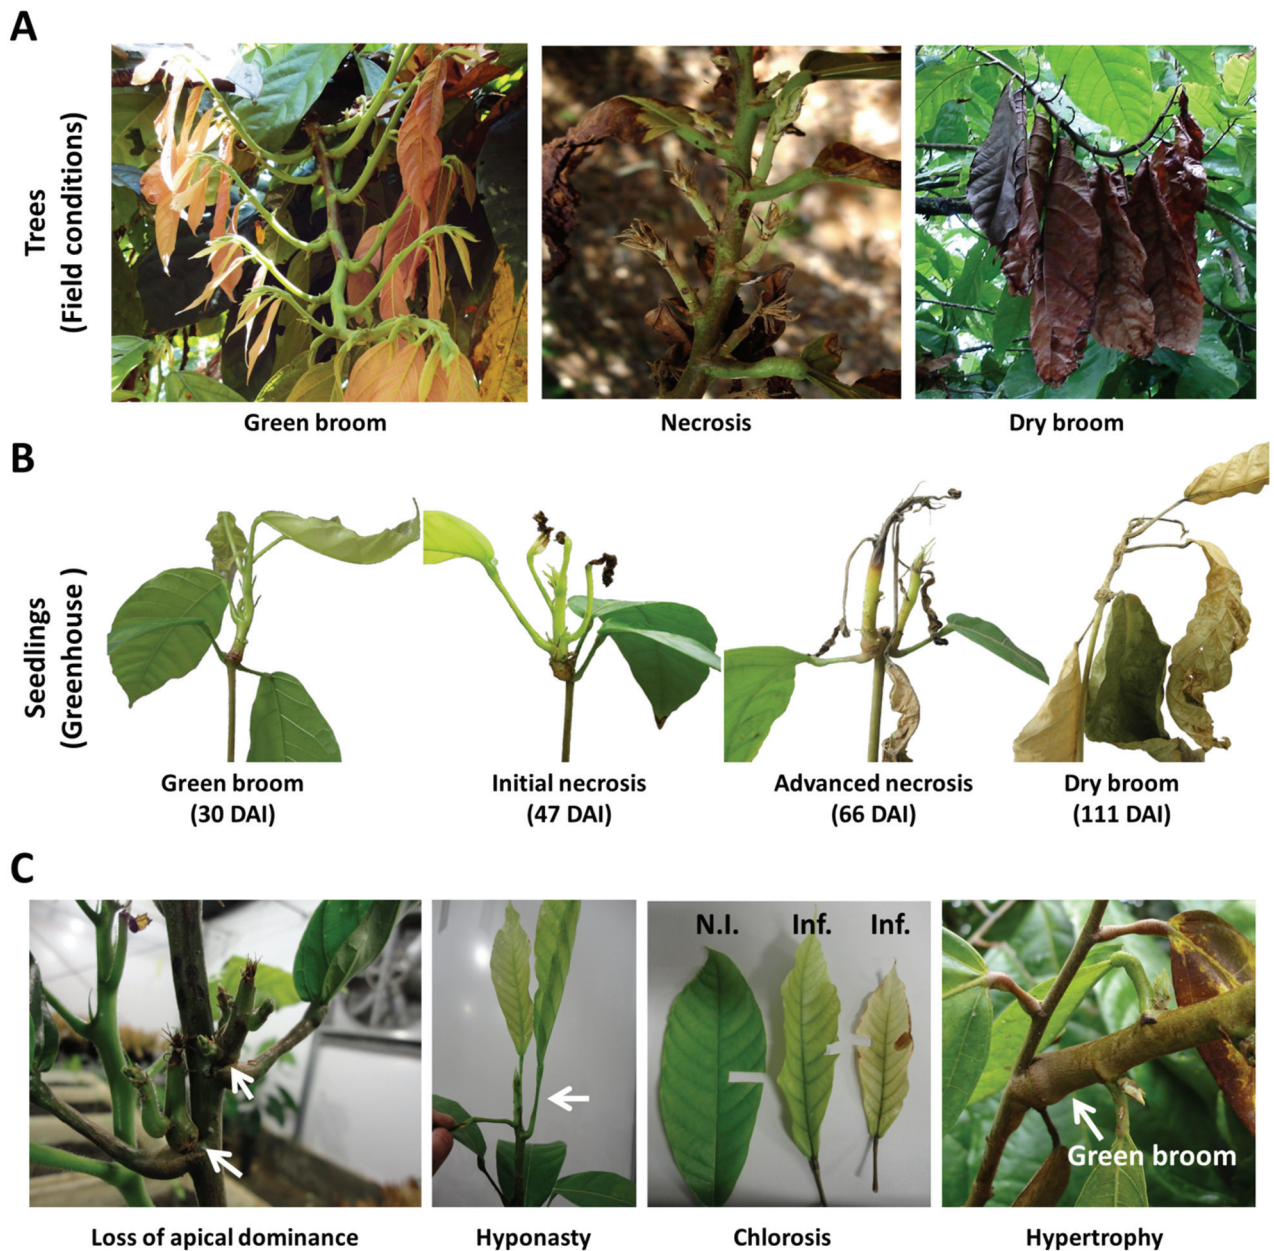

**Supplemental Figure 1.** Detailed view of WBD progression and the major symptoms observed in cacao plants during disease development. (A) Development of brooms in trees under field conditions. (B) Development of brooms in seedlings under greenhouse conditions. DAI, days after infection. (C) Major symptoms of WBD (indicated by arrows) include loss of apical dominance, hyponasty, chlorosis (N.I. = non-infected leaf; Inf. = infected leaf) and hypertrophy of the infected shoots.

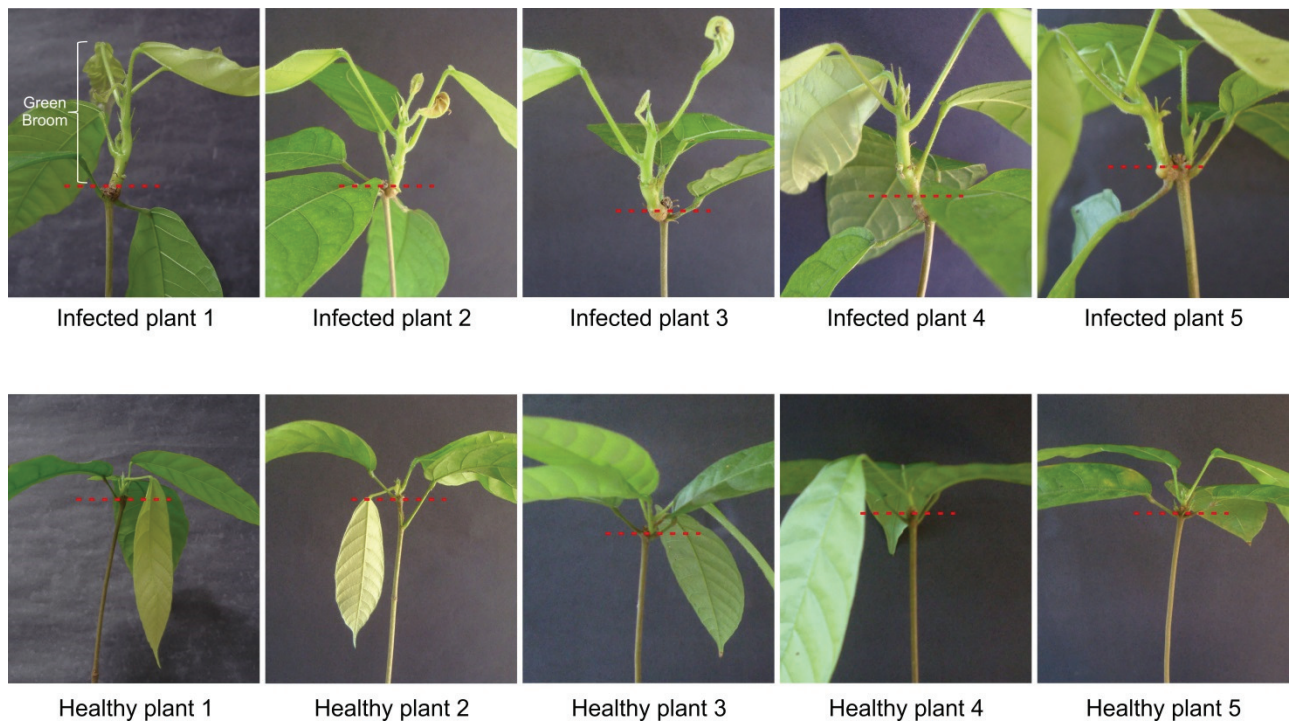

**Supplemental Figure 2.** Plant tissue collected for gene expression analysis. The apical portions of the ten cacao plants used in the experiment are shown. Dashed lines represent the sectioning position for sample harvesting. All plant tissue above this point, including shoots and leaves, was collected for RNA extraction.

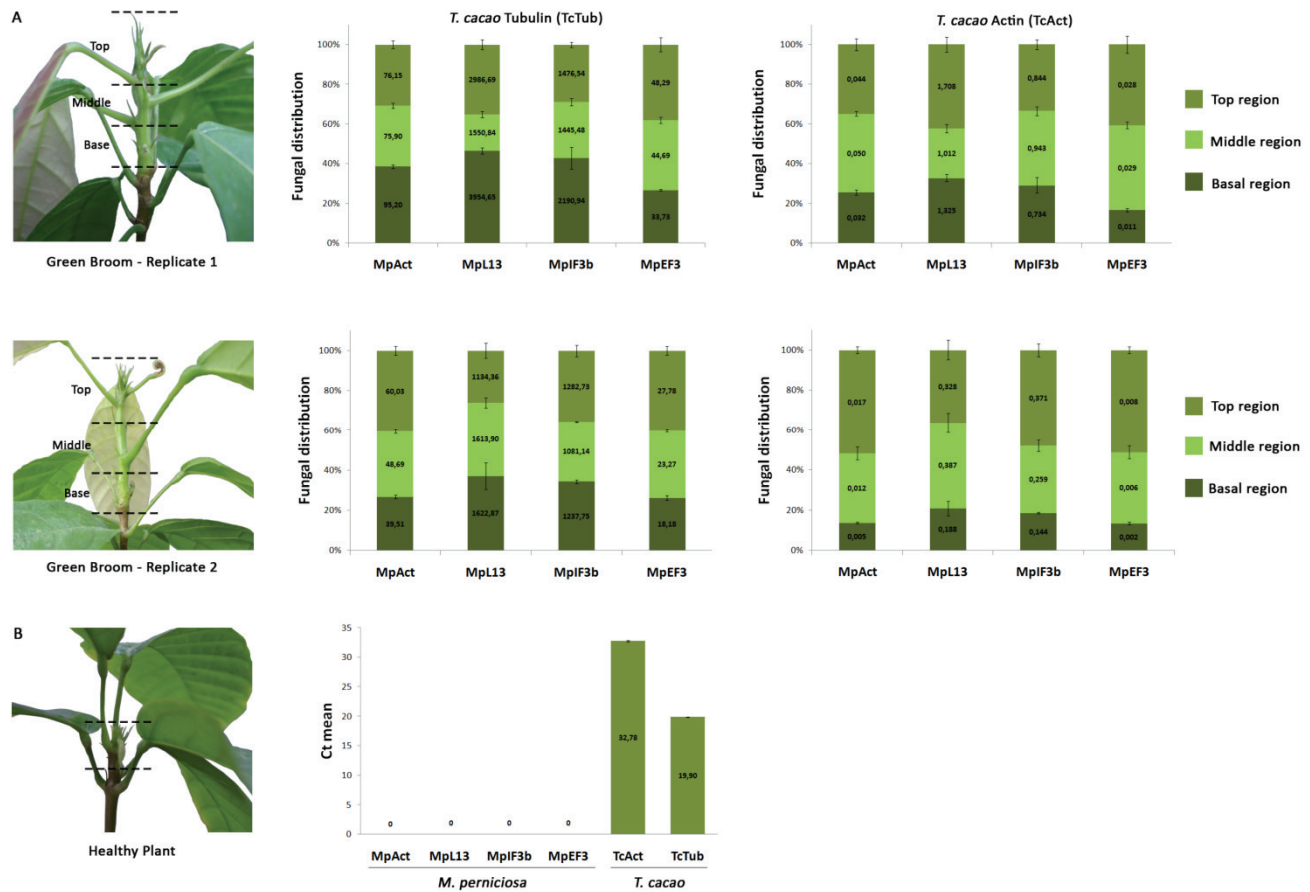

**Supplemental Figure 3.** *M. perniciosa* is uniformly distributed along the infected shoot. (A) Green brooms were sectioned into three different parts (dashed lines; basal, middle and top regions) and qPCR assays were performed to identify *M. perniciosa* transcripts. Four different constitutive fungal genes were analyzed (*MpAct*, *MpL13*, *MPIF3b* and *MpEF3*) and their expressions were normalized by either the cacao tubulin or actin genes. Relative expression levels are given as  $2^{-\Delta Ct}$  and are shown in each bar. Fungal distribution represents the abundance of fungal transcripts in each sector of the green broom relative to the sum of the three sectors. (B) Amplification of fungal transcripts was not observed in healthy plants (numbers in the bars represent the cycle threshold – Ct). Error bars represent standard deviation of three measurements.

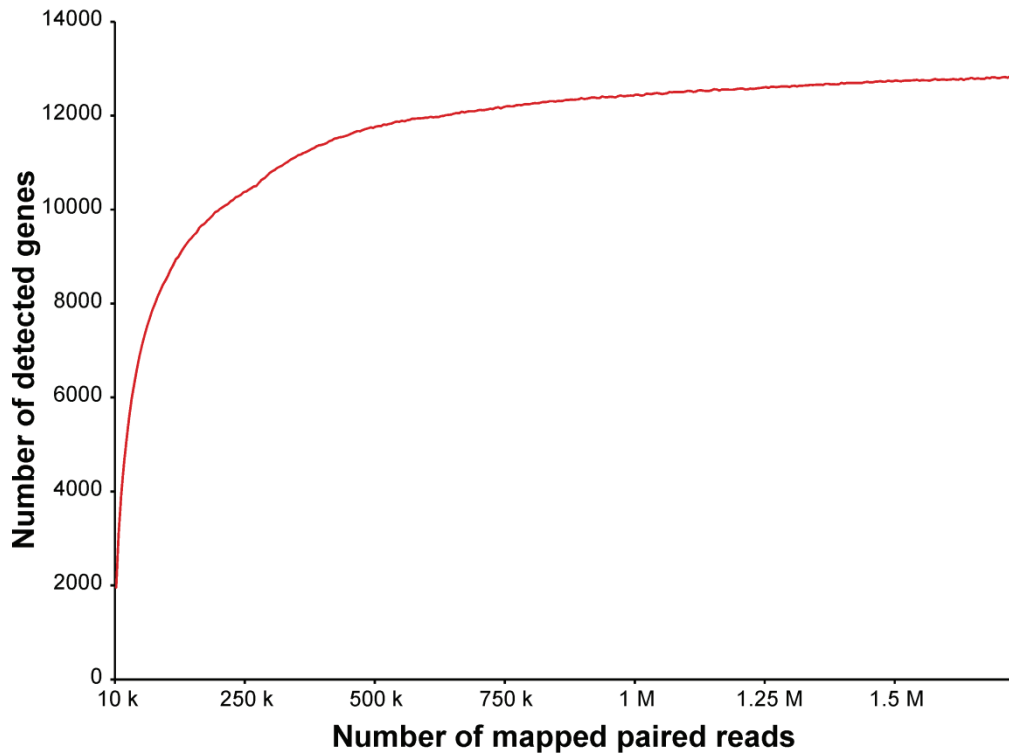

**Supplemental Figure 4.** Number of *Moniliophthora perniciosa* genes detected at different sequencing depths. Considering the 1.7 million paired reads mapping to *M. perniciosa* in our experiment, we identified approximately 13,000 fungal genes that were detected in at least one of the replicates. A total of 8,617 genes were detected in all five replicates. A gene was considered as being expressed if it had an expression value of at least 1 RPKM (reads per kilobase per million mapped reads).

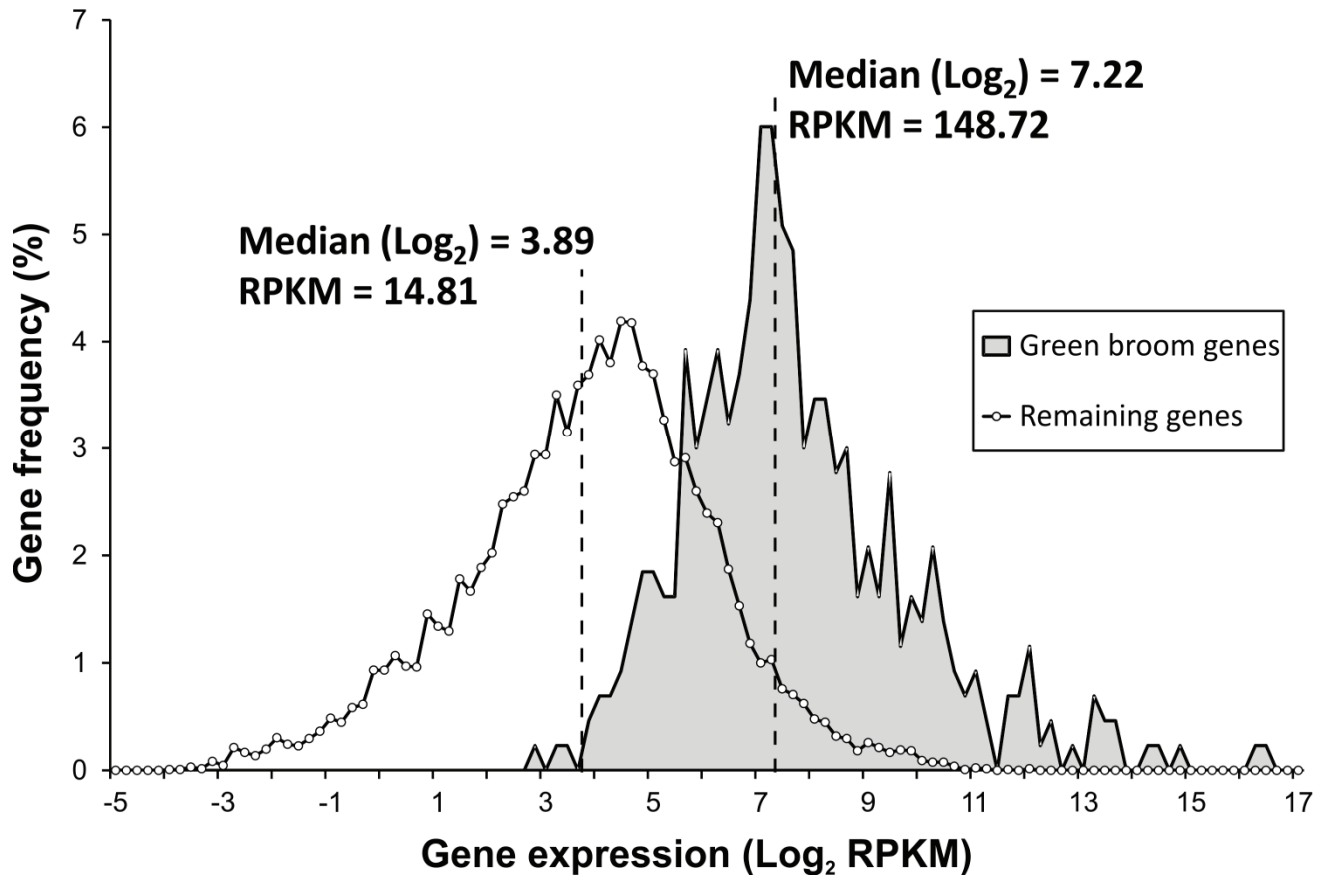

**Supplemental Figure 5.** Distribution of expression levels of *M. perniciosa* genes in green brooms. Generally, the 433 fungal genes classified as ‘green broom-specific’ were strongly up-regulated during the biotrophic colonization of the cacao plant. Interestingly, other highly expressed genes that were not part of the green broom cluster encoded mostly housekeeping proteins, such as elongation factors or ribosomal proteins (see Supplemental Data Set 8 online).



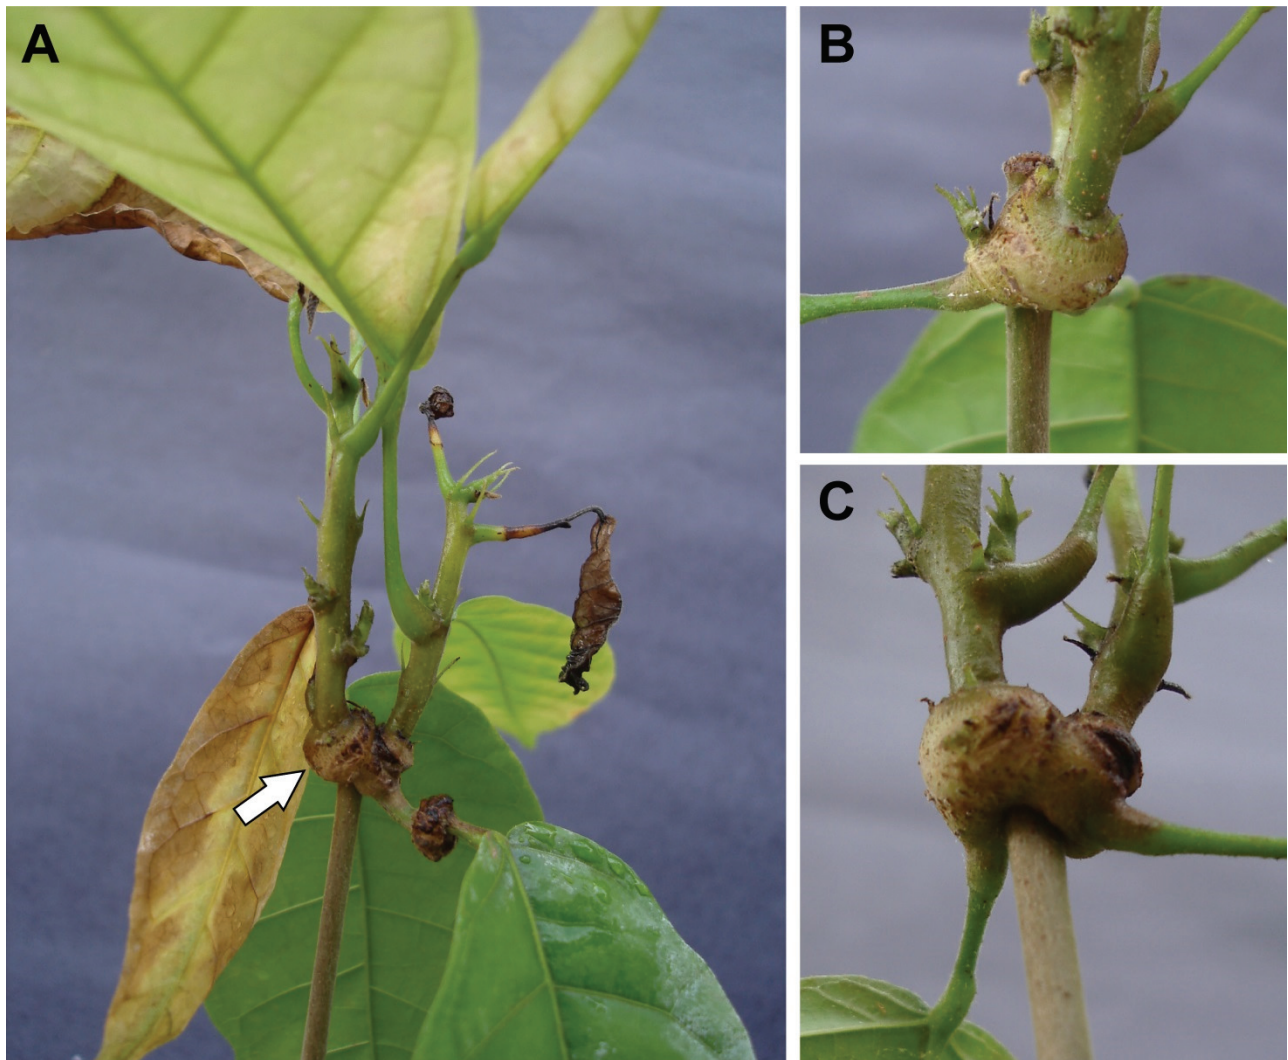

**Supplemental Figure 6.** Callus-like structure formed on the basal region of infected shoots. (A) These structures (arrow) form during WBD progression and block the communication between healthy and infected parts of the plant. Note that the pattern of necrosis in infected shoots is similar to that of regular senescence. (B) and (C) Details of the callus-like structures. Photograph taken 50 days after infection.

## SUPPLEMENTAL TABLES

Supplemental Table 1. Primer sequences used for cacao qPCR analyses.

| Gene ID    | Gene description                             | Forward primer                 | Reverse primer                 |
|------------|----------------------------------------------|--------------------------------|--------------------------------|
| CGD0027635 | Pathogenesis-related protein 1               | 5' ACCTTATGGCGAGAACCTTG 3'     | 5' GGAGTAATCATAGTCGGCCTTC 3'   |
| CGD0015104 | Malate synthase                              | 5' TTCTCATCAGGACATGCCATAGG 3'  | 5' CCTCATTGCTGCTGGATCATCT 3'   |
| CGD0012378 | Isocitrate lyase                             | 5' ACTGTCCAGGGAGGCATCTCATC 3'  | 5' CCTCACCTCCAACGCCCGT 3'      |
| CGD0019988 | Beta xylosidase                              | 5' TTACAATCAAGTCAATGGGAAGC 3'  | 5' CAACCGAATCACAACTGACAC 3'    |
| CGD0008202 | Endochitinase I                              | 5' AACCCCGCTGATTACTGC 3'       | 5' TTCCACACTGCCCATAGTTG 3'     |
| CGD0013652 | Aquaporin                                    | 5' GCTCTTAGGTGCTATTGTGGC 3'    | 5' AACTCCCAACTCCAGACG 3'       |
| CGD0023677 | Similar to protease inhibitors               | 5' GCGTCTAGCTCTTAGTGATGTGC 3'  | 5' AGTGAGAATGGTGTGGGTAAAT 3'   |
| CGD0010241 | SAG29 (Senescence-associated protein 29)     | 5' CCTTAAACATTGTGGCACGAG 3'    | 5' TGAATAGTCCATAGGCAAACCAC 3'  |
| CGD0034897 | Peroxidase IV                                | 5' TTTGTCTGGTGTAGTTTCTCG 3'    | 5' GCTTAACATCCCAGTCAGGTC 3'    |
| CGD0034326 | Asparagine synthetase (ASN1)                 | 5' TACATCTTCCCTCACAATACCCC 3'  | 5' GGACAGTCAATCTAGCGGAGTT 3'   |
| CGD0020178 | Integral membrane protein                    | 5' ACGCCTGCATATCCAAAAGC 3'     | 5' TCCGATATACGCAACACCCC 3'     |
| CGD0020550 | 4-hydroxyphenylpyruvate dioxygenase          | 5' CCTCTTCCACTGCTTCCATCC 3'    | 5' GTTTCGGCGTCTTCCACTTCG 3'    |
| CGD0003335 | Triacylglycerol lipase                       | 5' ACTCCACCATCTCAGGCAATTAG 3'  | 5' GATCTACCAATGCCATCACTAGC 3'  |
| CGD0025812 | ACC oxidase 1                                | 5' AAAGATGCCTGTGAGAATTGGG 3'   | 5' ACTTCTGTAGTGCTCCTTTGTC 3'   |
| CGD0003150 | Gibberellic acid receptor                    | 5' GTGGGAAGGATTCTAAAGTCTATG 3' | 5' GTTACCTAATACCTCAACATCTGC 3' |
| CGD0030359 | Alpha-amylase                                | 5' CCCTTCCCATCTGACAAAAGTC 3'   | 5' TCTCATCCTTCAAACCCCAATC 3'   |
| CGD0014936 | NADPH oxidase                                | 5' TCAGAGCCGATAACAAGCCAGA 3'   | 5' CAACCCACTAGCAAAACCACTTC 3'  |
| CGD0030866 | Acyl-CoA-binding protein (acbp)              | 5' AGTTCATTTCCAGATCAGCAGAC 3'  | 5' TCAGTGCTTGTGCTCTCAGTTA 3'   |
| CGD0029727 | Alpha tubulin 1                              | 5' ACCAATCTTAAACCGCCTTGCTC 3'  | 5' GTTAGTCTGGAACCTCAGTCACAT 3' |
| CGD0021775 | 60S ribosomal protein L35                    | 5' CGAGCGCTTACTAAACACCAG 3'    | 5' GAGAACACTTGGCTCCATTACAC 3'  |
| CGD0001967 | 60S ribosomal protein L11                    | 5' TTACCCCTCCATTTTCATCCAG 3'   | 5' GCTTCTGTACCTTGATTCCCTC 3'   |
| CGD0023921 | Actin                                        | 5' TACTATTTGATTGTAGAAGCATTG 3' | 5' TTGGTCTTGTGATTATATGAAGG 3'  |
| CGD0026243 | Magnesium-chelatase subunit chlI             | 5' GTCTCTCGTTACACCTTCCTCG 3'   | 5' CTGAACCCCAAACCTCCATAAA 3'   |
| CGD0018362 | Ribulose biphosphate carboxylase small chain | 5' CAATAAGTGGGTTCCGTGCTTGG 3'  | 5' GTTCCACATGATCCAGCAGCG 3'    |
| CGD0003251 | PSI reaction center subunit II (PsaD)        | 5' ACAATCAGCACCCGAAATCC 3'     | 5' AGCCCTAATGGTACTGTGAGC 3'    |
| CGD0034137 | PSAO (photosystem I subunit O)               | 5' GCTAGGAACCCCTTTGATGCTG 3'   | 5' CCACCCAATCAGCCCAAATC 3'     |
| CGD0002031 | Rhamnose synthase                            | 5' TCTAGGGTCAGGAATTGGGTTC 3'   | 5' CATTGTCTACTCCCTCAGAAGC 3'   |
| CGD0011230 | Polygalacturonase                            | 5' ACTCATAATCCACTAAACAGC 3'    | 5' CTCCCGTAAACCTAAGTGC 3'      |
| CGD0003164 | Histone H2AX                                 | 5' TGTCTTGTAGTATCTCGCCG 3'     | 5' TTCATCGTTTCTCACAGCCAAC 3'   |
| CGD0006481 | Lipid binding protein                        | 5' CATTCTGATCGTCTGTGG 3'       | 5' GGGTACTTCTAATGGTAGGCAC 3'   |
| CGD0003215 | Fantastic four 2 like                        | 5' GACCAAGCCTTCGCCCTATAATG 3'  | 5' TCCACCCACCCGTGCAACAT 3'     |
| CGD0011230 | Polygalacturonase                            | 5' ACTCATAATCCACTAAACAGC 3'    | 5' CTCCCGTAAACCTAAGTGC 3'      |

**Supplemental Table 2.** Primer sequences used for *M. pernicioso* qPCR analyses.

| Gene ID | Gene description                    | Forward primer                           | Reverse primer                        |
|---------|-------------------------------------|------------------------------------------|---------------------------------------|
| MP04381 | Protein kinase                      | 5' CAAACGCGAGCTACGAGCAC 3'               | 5' CTGGGCCTTTAAACGGAGACG 3'           |
| MP05620 | Hypothetical protein                | 5' TCTACTGTGATCCGCATAGCAAG 3'            | 5' GATCCTCAAGGGAGCTTCAGGTG 3'         |
| MP05651 | Cell wall glucanase                 | 5' AGATTCAAACCGCCACCAAACC 3'             | 5' TCAATTCATCCCTTCGGACCTG 3'          |
| MP08861 | Fruit-body specific gene a          | 5' TCTCTTCTCGTTACTGGCTCTTG 3'            | 5' TGGATGTGTTGCTCAAGTCTAGC 3'         |
| MP11703 | No hits                             | 5' GATGCCATTGCGCCTAAAAGGG 3'             | 5' GAGGGTAAGCAGCAGGAATAAAGTCCTTTA 3'  |
| MP03904 | Fasciclin-like                      | 5' CAGTCGGTCGCACGCTCTTG 3'               | 5' GATACCAATCCCGTATCGACCATAC 3'       |
| MP07491 | No hits (CSEP)                      | 5' AACATCCAGGACTATGATTATGACTACACTTATT 3' | 5' TTAGTCGTTCTGGTGTGGGTCGG 3'         |
| MP08165 | No hits (CSEP)                      | 5' ATCAAGCTACGTGTGAAACCGA 3'             | 5' CCAGTCTGGTAGCCGTCACC 3'            |
| MP10355 | Chitin deacetylase 9                | 5' TATGGCCGTCGATGGGCTATGTA 3'            | 5' CTGTGGCAGTATCATTCCGGCATGTT 3'      |
| MP12416 | No hits (CSEP)                      | 5' GACGTTGTGCGCGAGACAAAGTC 3'            | 5' CCAAGTTGTAGTTGGTTTTACGATTGTTA 3'   |
| MP01616 | No hits (CSEP)                      | 5' CGTTTTTGTATAGATCAGTTACACCCT 3'        | 5' GAGTCACGGTATTTAGCCGGTAAAC 3'       |
| MP05440 | Gamma-aminobutyric acid transporter | 5' TCGCAAACCAATGTATCTGGCT 3'             | 5' ATGGTGACGGCTCCGAAAATAAC 3'         |
| MP05573 | No hits (CSEP)                      | 5' GCGATAACAAGATAGGCGGTTGGG 3'           | 5' GGTTTTGTATCGTCTGGCAGGGTC 3'        |
| MP07624 | Hypothetical protein (CSEP)         | 5' GAACACCCAGCTACGGTCTAGG 3'             | 5' GTGGTATCGGCACAGGTGATAGG 3'         |
| MP07720 | No hits (CSEP)                      | 5' CAACCAAGGGGTGCAGAGCTTTG 3'            | 5' TCGGGTTTTGTACCAATCAGCG 3'          |
| MP09116 | Catalase                            | 5' TGACCACGAAAATATCCCTGAACG 3'           | 5' TGAGATTAGACCAGTCACCATACGATT 3'     |
| MP09913 | No hits (CSEP)                      | 5' CAACCAGTAACAGCACATGGCTG 3'            | 5' CACAACATCCGCCCTGAAGGC 3'           |
| MP10165 | No hits (CSEP)                      | 5' CTGGGTATGATTGCACACTACAC 3'            | 5' CAAACTGGTCGCTCCTTCTACAC 3'         |
| MP10658 | No hits (CSEP)                      | 5' CCATTCCAGCCGACTTAGAGC 3'              | 5' GGTGTTGTACGCCACACGATC 3'           |
| MP02381 | Amino acid transporter              | 5' CGATTTTACTCGGGCCTTAAAGCAC 3'          | 5' CCTTCAGGAACACATTCCAGCCAC 3'        |
| MP12254 | Terpene cyclase                     | 5' CTTGTTTGGTATTTTACTTGTGGGA 3'          | 5' GTCGTATAGAATTTTATAGGAGTAATCGTGA 3' |
| MP12302 | Asparaginase homolog                | 5' TAGAGGATCTCGGGAAGACAGTC 3'            | 5' GTAGCGTCATTCCTCAGTTGAGAA 3'        |
| MP13732 | C6 transcription factor             | 5' TGAAATAGCCAAAATCCCTATATTGG 3'         | 5' TGGTCTCACGGCTAGCGTACA 3'           |
| MP14639 | CFEM domain                         | 5' GAACACAGAGGGCTGTGGTG 3'               | 5' CGGGTCTGCTCTGGGGGAG 3'             |
| MP14755 | No hits (CSEP)                      | 5' CCATCATCTTGGGCGACATAGC 3'             | 5' AGACGATTTGGACAGCAGTTTGG 3'         |
| MP15342 | Endo-polygalacturonase              | 5' GCTGGGAATGGAGTATCGCTCAA 3'            | 5' GTTCCATTTGCCTGAGCAGTTAG 3'         |
| MP13831 | No hits (CSEP)                      | 5' GGTTAGCACACGGGACTGTCAGG 3'            | 5' GCCATTGCCGAACCTTAGTCGATTC 3'       |
| MP15672 | Cytochrome p450                     | 5' CATTGTGCCCGCAGGAACATCA 3'             | 5' ACCAAAAGTTATATACTCGGGGTTGG 3'      |
| MP16298 | Hexose transporter protein          | 5' CCTTAAATTGCTTGGTGCTTGATAAT 3'         | 5' CACGACCAGCTATAAGCATCCC 3'          |
| MP16558 | No hits (CSEP)                      | 5' AATATCCGAGGTTACATCGGGCA 3'            | 5' GGACAAAATAATAGATCAGCGTGTGA 3'      |
| MP00102 | Asparagine amidase a                | 5' CCCTTGATACTCGCATCCACTAC 3'            | 5' AGGTATCCAGATCGCTCCTTG 3'           |
| MP07852 | F-box protein                       | 5' TCTCACACATAACTTGGTCTACG 3'            | 5' ATCCTGGACAGCTATACAGCGGT 3'         |
| MP10524 | No hits (CSEP)                      | 5' CAAGGGACACAATTAAGTACACAGC 3'          | 5' TGTTGAGAACGACGACTACACAGG 3'        |
| MP13717 | No hits (CSEP)                      | 5' GCAAAGATACTTCGCACTGGTTGTC 3'          | 5' TCTTCTTCTCCAGTCTCGGGC 3'           |
| MP02311 | Exoglucanase 3 precursor            | 5' TCGCTGTCGGAGAGATCGATAGG 3'            | 5' CAATATCGGGGTGTGCCTCGACA 3'         |
| MP07531 | Hypothetical protein                | 5' CAACAACATGACTTCTGGCGAGC 3'            | 5' ATCGTATTCTGCCTGACCACGGG 3'         |
| MP10673 | No hits                             | 5' TGACACCACAGATTACTGTACAG 3'            | 5' CAGATGGTCTGTAGCTGGAATGCTT 3'       |
| MP14969 | Extracellular protease              | 5' TCAGGTTTATACCAACAGCTCTTACG 3'         | 5' TGCCAAACCAGTTTCATAGCGA 3'          |
| MP07692 | Thaumatococin-like protein          | 5' CGTCTGGTACTGAGGTGTCTTT 3'             | 5' AAGAAGTCGGTCTGGGTTAG 3'            |
| MP12125 | MpPR-1h                             | 5' CCGCGGTTACAGTATGGC 3'                 | 5' CACGTGGAGCGTAGTGGG 3'              |
| MP05107 | MpEF3                               | 5' GGAGAACTACCTTACCAGCTTG 3'             | 5' ATTGCCACGGTATCTCTTGGAG 3'          |
| MP05317 | MpIF3b                              | 5' CCCTGTAGAAGTCGTGGAATTG 3'             | 5' GACAATGGCAAATCGTTCTCC 3'           |
| MP07289 | MpL13                               | 5' ATGGACAAGAAACCGGAAGAG 3'              | 5' GCCAACTACGATGACATTAG 3'            |
| MP12536 | MpActin                             | 5' CCCTTCTATCGTCGGTCTG 3'                | 5' AGGATACCACGCTTGGATTG 3'            |



**Supplemental Table 3.** Identification of *NEP* genes in basidiomycetes. The table consolidates the results from Blast searches against the NCBI nr and the JGI Mycocosm databases.

| <b>Species</b>                                     | <b>Subphylum</b>   | <b>Lifestyle</b> | <b># of <i>NEP</i> genes</b> |
|----------------------------------------------------|--------------------|------------------|------------------------------|
| <i>Moniliophthora perniciosa</i>                   | Agaricomycotina    | Cacao pathogen   | 5                            |
| <i>Moniliophthora roreri</i>                       | Agaricomycotina    | Cacao pathogen   | 3                            |
| <i>Pseudozyma flocculosa</i>                       | Ustilaginomycotina | Mycoparasite     | 2                            |
| <i>Agaricostilbum hyphaenes</i> ATCC MYA-4628 v1.0 | Pucciniomycotina   | Mycoparasite     | 1                            |
| <i>Exidia glandulosa</i> v1.0                      | Agaricomycotina    | Saprotroph       | 2                            |
| <i>Ganoderma</i> sp. 10597 SSI v1.0                | Agaricomycotina    | Saprotroph       | 1                            |
| <i>Lentinus tigrinus</i> ALCF2SSI-6 v1.0           | Agaricomycotina    | Saprotroph       | 2                            |
| <i>Naiadella fluitans</i> ATCC 64713 v1.0          | Pucciniomycotina   | Mycoparasite     | 5                            |
| <i>Polyporus arcularius</i> v1.0                   | Agaricomycotina    | Saprotroph       | 1                            |
| <i>Sistotrema brinkmannii</i> HHB7604 ss-1 v1.0    | Agaricomycotina    | Saprotroph       | 1                            |
